# Supplementary material for: Photocatalysts Based on Graphite-like Carbon Nitride with a Low Content of Rhodium and Palladium for Hydrogen Production under Visible Light
Source: MDPI journal article supplement (doi:10.3390/nano13152176), 2023-07-26
Supplement: s1 [file s1]

# Photocatalysts based on graphite-like carbon nitride with a low content of rhodium and palladium for the hydrogen production under the visible light

Angelina V. Zhurenok <sup>1</sup>, Danila B. Vasichenko <sup>1,2</sup>, Semen N. Berdyugin <sup>2</sup>, Evgeny Yu. Gerasimov <sup>1</sup>, Andrey A. Saraev <sup>1</sup>, Svetlana V. Cherepanova <sup>1</sup>, Ekaterina A. Kozlova <sup>1,\*</sup>

<sup>1</sup> Federal Research Center, Boreskov Institute of Catalysis SB RAS, Lavrentieva Ave. 5, Novosibirsk 630090, Russia; angelinazhurenok@gmail.com (A.V.Z.); vasilchenko@niic.nsc.ru (D.B.V.); gerasimov@catalysis.ru (E.Y.G.); asaraev@catalysis.ru (A.A.S.); svch@catalysis.ru (S.V.C.)

<sup>2</sup> Nikolaev Institute of Inorganic Chemistry, Siberian Branch of the Russian Academy of Science, Novosibirsk 630090, Russia; berdyugin@niic.nsc.ru

\* Correspondence: kozlova@catalysis.ru

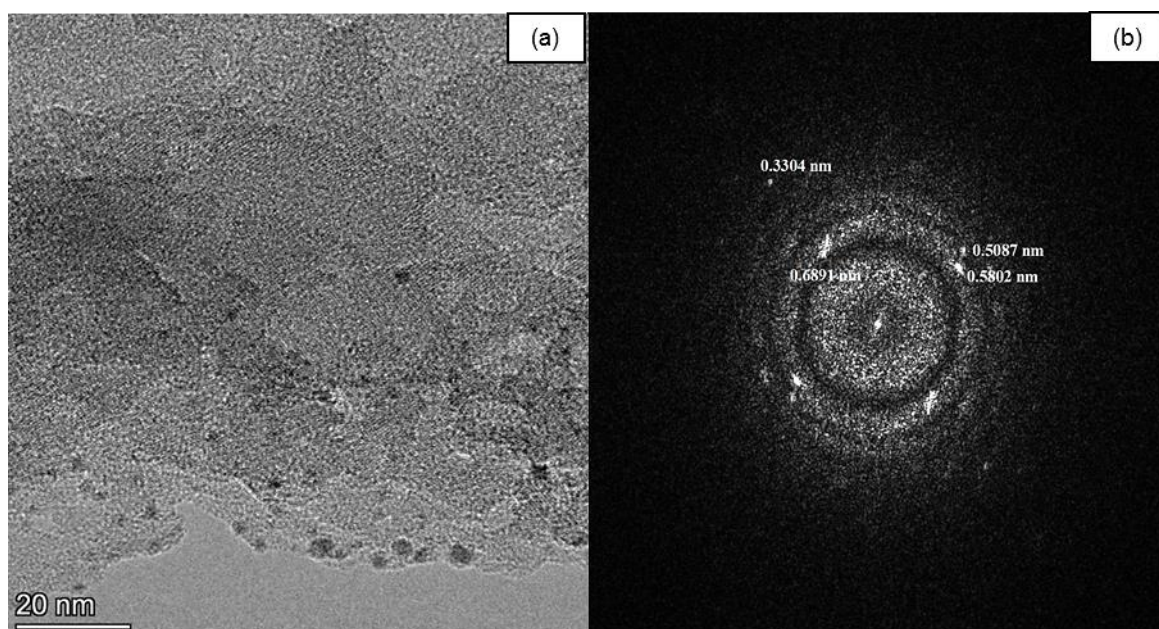

**Figure S1.** (a,b) HRTEM images of 0.5% Rh/g-C<sub>3</sub>N<sub>4</sub> and Fourier transform from the highlighted image

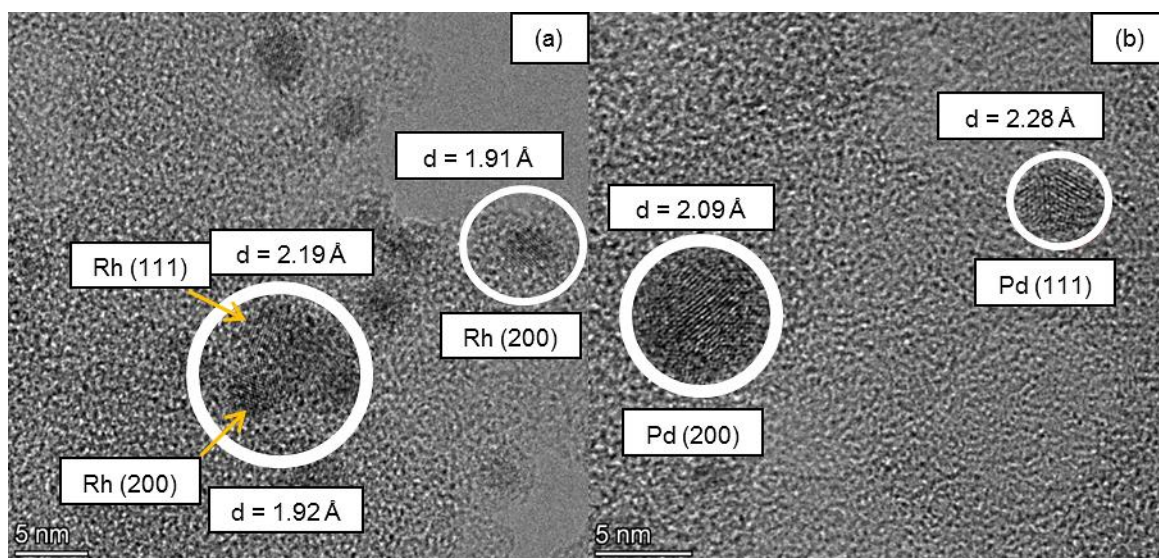

**Figure S2.** (a,b) HRTEM images of 0.5% Rh/g-C<sub>3</sub>N<sub>4</sub> and 0.5% Pd/g-C<sub>3</sub>N<sub>4</sub>

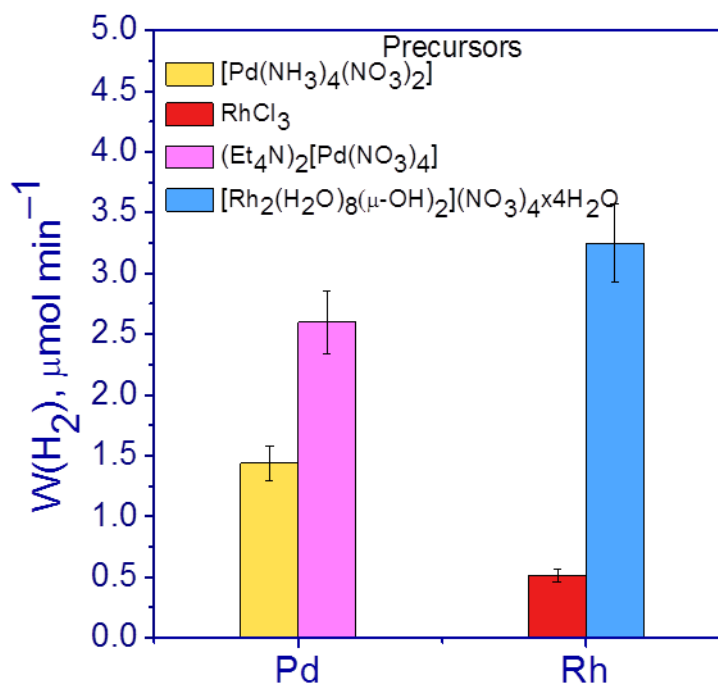

**Figure S3.** H<sub>2</sub> evolution rates for photocatalysts 0.5% Pd/g-C<sub>3</sub>N<sub>4</sub> and 0.5% Rh/g-C<sub>3</sub>N<sub>4</sub> synthesized from different metal precursors.

**Table S1.** Actual metal content in the samples determined with ICP AES

| Sample                                                                                                         | Pd content, wt. % | Rh content, wt. % |
|----------------------------------------------------------------------------------------------------------------|-------------------|-------------------|
| 0.1% Pd/g-C <sub>3</sub> N <sub>4</sub>                                                                        | 0.093 ± 0.009     | -                 |
| 0.5% Pd/g-C <sub>3</sub> N <sub>4</sub>                                                                        | 0.45 ± 0.05       | -                 |
| 0.5% Pd/g-C <sub>3</sub> N <sub>4</sub> ([Pd(NH <sub>3</sub> ) <sub>4</sub> (NO <sub>3</sub> ) <sub>2</sub> ]) | 0.053 ± 0.05      | -                 |
| 0.1% Rh/g-C <sub>3</sub> N <sub>4</sub>                                                                        | -                 | 0.13 ± 0.01       |

**Table S2.** Surface element atomic concentration calculated based on XPS data of fresh 0.5% Pd/g-C<sub>3</sub>N<sub>4</sub> and 0.5% Rh/g-C<sub>3</sub>N<sub>4</sub> photocatalysts and these photocatalysts after cyclic runs in 0.1 M NaOH and water (Figures 8-9).

| Catalyst     | %, C (C <sub>3</sub> N <sub>4</sub> ) | %, C (carbon) | %, N (C <sub>3</sub> N <sub>4</sub> ) | %, O | %, Pd |
|--------------|---------------------------------------|---------------|---------------------------------------|------|-------|
| 0.5%Pd-fresh | 27.4                                  | 32.3          | 34.3                                  | 6.0  | 0.02  |
| 0.5%Pd-NaOH  | 27.0                                  | 33.6          | 31.8                                  | 7.6  | 0.01  |
| 0.5%Pd-water | 25.6                                  | 38.1          | 27.4                                  | 8.9  | 0.02  |
|              | %, C (C <sub>3</sub> N <sub>4</sub> ) | %, C (carbon) | %, N (C <sub>3</sub> N <sub>4</sub> ) | %, O | %, Rh |
| 0.5%Rh-fresh | 24.0                                  | 40.7          | 26.5                                  | 8.6  | 0.22  |
| 0.5%Rh-NaOH  | 20.9                                  | 52.6          | 15.0                                  | 11.4 | 0.10  |
| 0.5%Rh-water | 25.6                                  | 39.4          | 26.4                                  | 8.5  | 0.09  |
